# Supplementary material for: FMRP regulates STAT3 mRNA localization to cellular protrusions and local translation to promote hepatocellular carcinoma metastasis
Source: PubMed Central journal article supplement (PMC8110961; doi:10.1038/s42003-021-02071-8), 2021-05-10
Supplement: 42003_2021_2071_MOESM3_ESM.pdf [file 42003_2021_2071_MOESM3_ESM.pdf]

## Description of Additional Supplementary Files

**File name:** Supplementary Data 1

**Description:** Source data underlying the graphs in the main figures.
